# Supplementary material for: Estimating Return Intervals for Extreme Climate Conditions Related to Winter Disasters and Livestock Mortality in Mongolia
Source: Copernicus journal article supplement (doi:10.5194/nhess-2021-258), 2021-09-08
Supplement: Supplementary file 1 [file nhess-2021-258-supplement.pdf]

1 Supplement

2 S1: How to select a threshold for GPD.

3 To fit a GPD, a threshold needs to be selected. We selected the thresholds in the following ways. Figure  
4 S.3 repeatedly fits the GPD to the data for a series of threshold choices along with uncertainty (Gilleland  
5 and Katz, 2016). Figure S.4Figure S.4 plots the mean excess values for a sequence of threshold choices  
6 with some variability information (Gilleland and Katz, 2016). As discussed in Gilleland and Katz (2016),  
7 choice of a threshold is subjective. Because a good choice of the threshold is near the inflection point of  
8 the right tail of the distribution, the value of 1.0 is selected as a threshold. This selection of 1 seems to  
9 yield estimates that will not change much as the threshold increases further from Figure S.3. Also,  
10 Gilleland and Katz (2016) suggests selecting a threshold whereby the graph is linear within uncertainty  
11 bounds in the plot of the mean excess values. Following this, the threshold value of 1 is a reasonable  
12 choice in Figure S.4. Furthermore, if I use this value for the threshold, the exceedance percentile of the  
13 threshold (a ratio of the number of exceedance to the number of total data) is 0.210 in the Southwest  
14 and 0.26 for both the northwest and east. Therefore, it is reasonable to use a threshold of 1.0.

15 S2: Figures

16

17

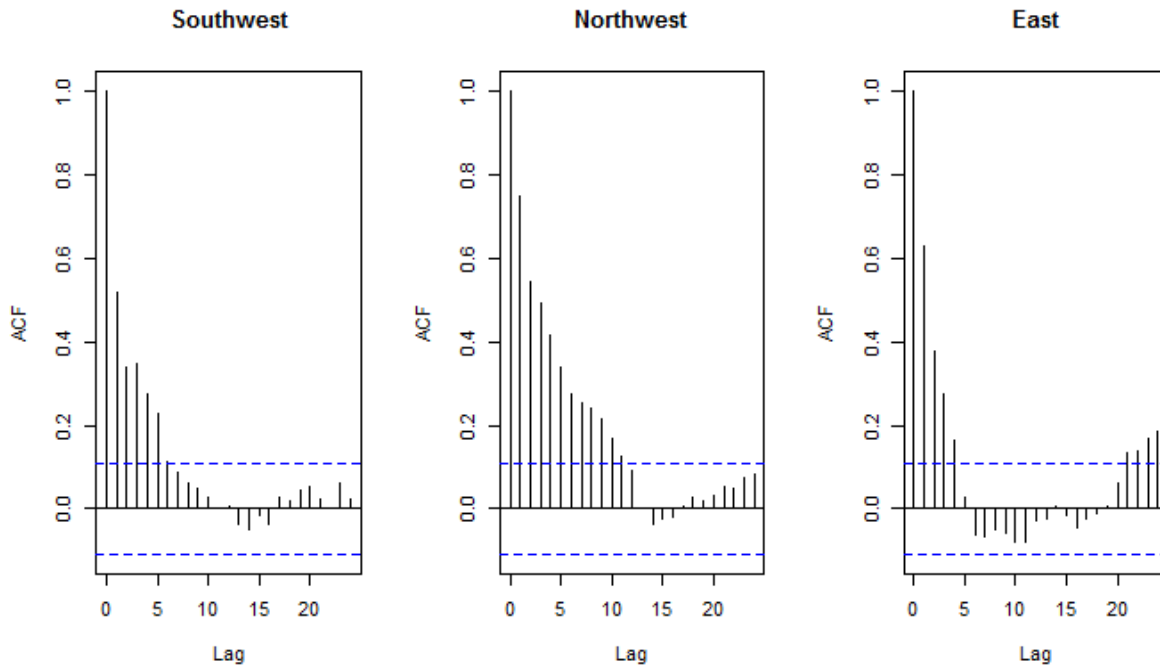

18  
19

Figure S.1: ACF of the tree-ring reconstructed PDSI in each cluster.

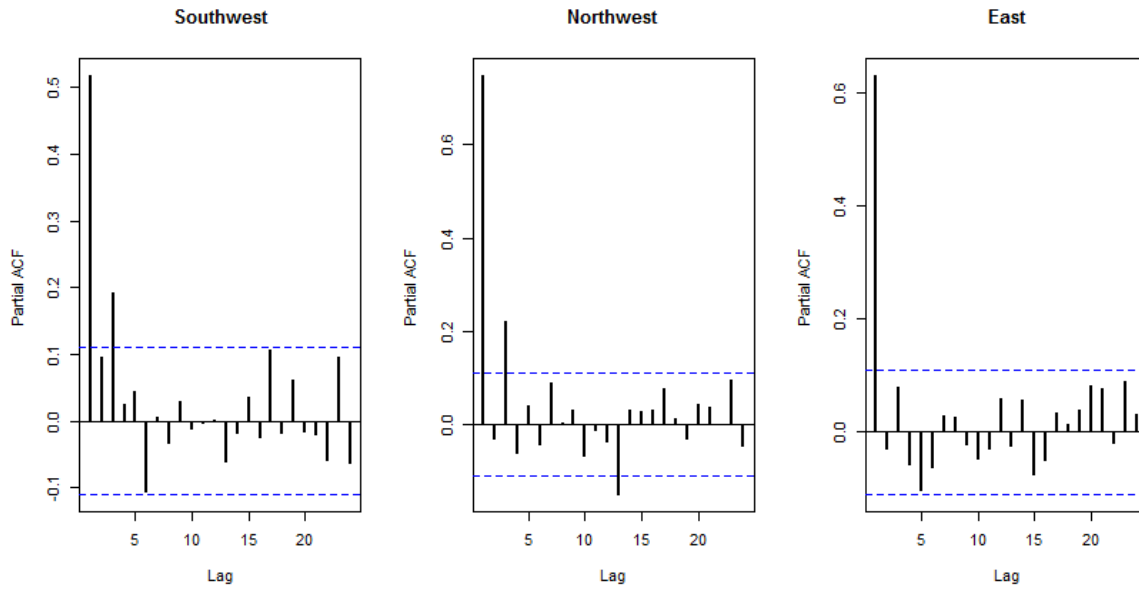

20  
21  
22  
23

Figure S.2: PACF of the tree-ring reconstructed PDSI in each cluster.

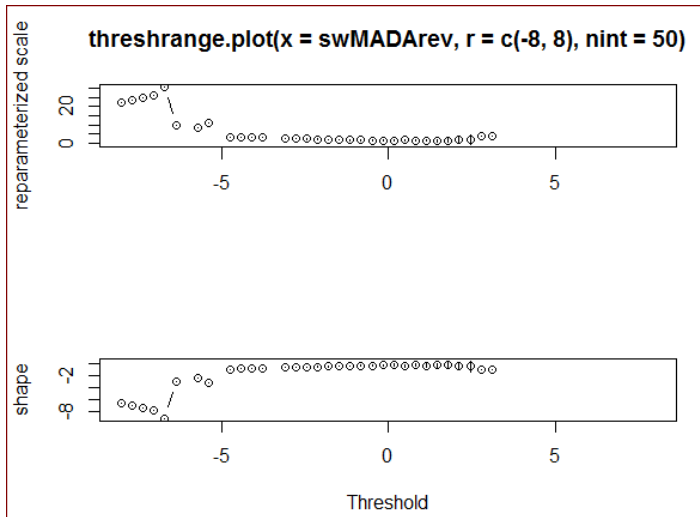

24  
25

Figure S.3: Threshold Range Plot (1)

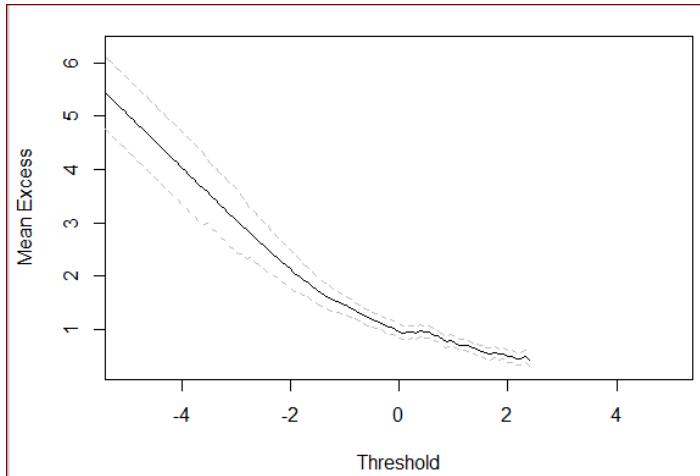

26  
27

Figure S.4: Threshold Range Plot (2)

28

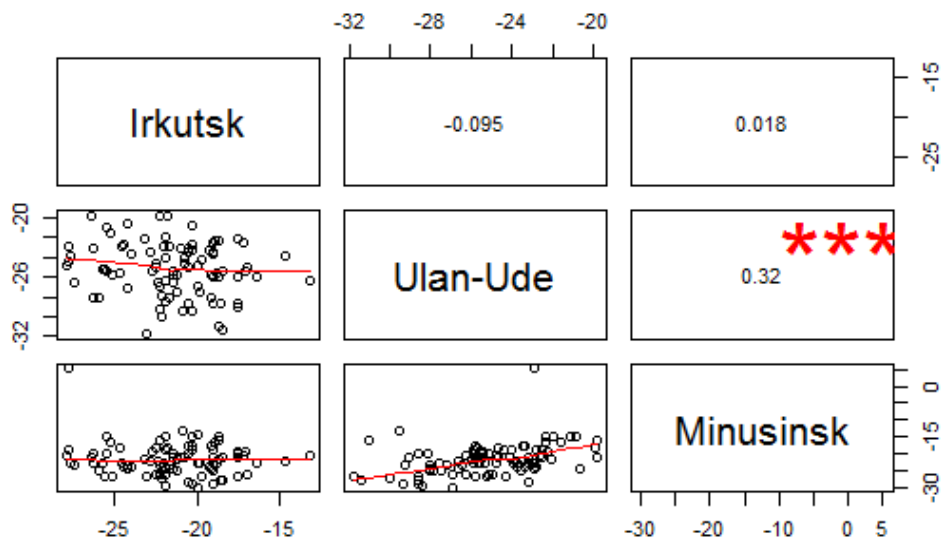

29  
30

Figure S.5: Scatterplots between winter minimum temperature in three Siberia stations.

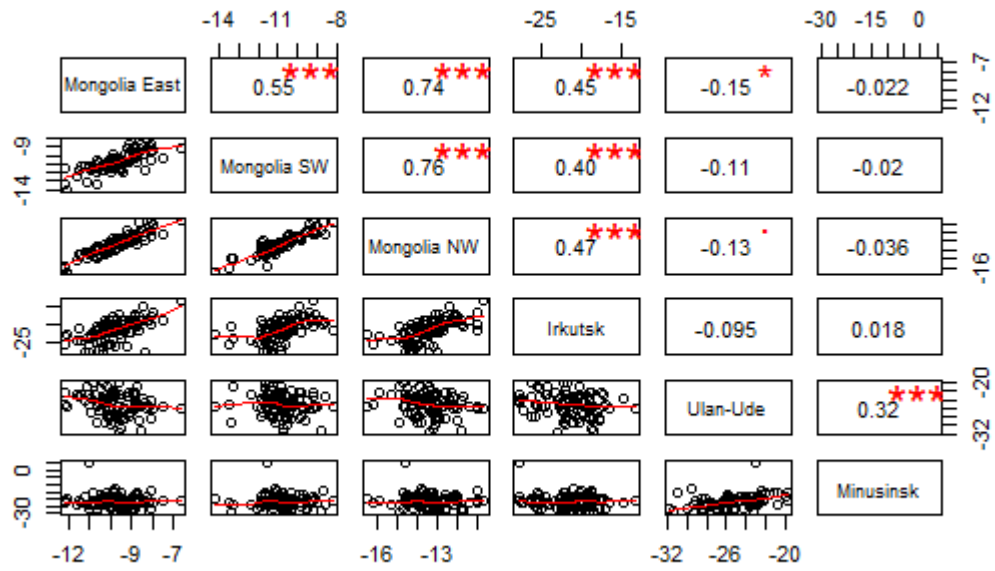

31 Figure S.6: Scatterplots of winter average temperature in three Siberia and three Mongolia clusters.  
 32

33

34

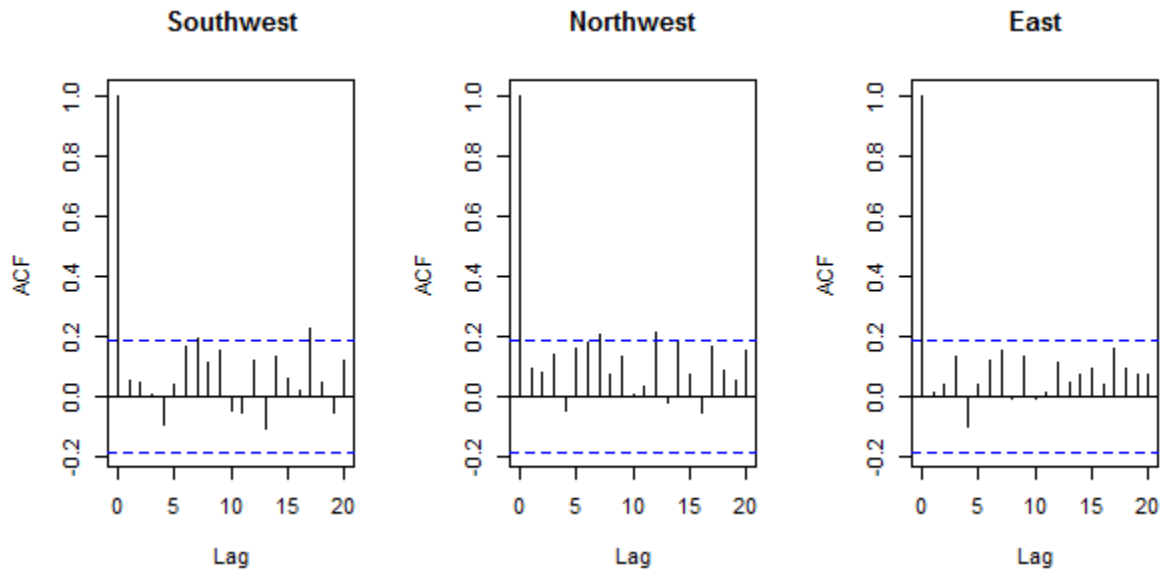

35 Figure S.7: ACF of residuals between data from Irkutsk Siberia and the winter average temperature of each cluster.  
 36

37

38 **A.3: Tables**

39 **Table S.1: 95% Confidence intervals of parameters based on the normal approximation for each region.**

|                         | 95% lower CI | Estimate | 95% upper CI |
|-------------------------|--------------|----------|--------------|
| <b>Southwest</b>        |              |          |              |
| Location ( $\alpha_0$ ) | -0.56        | -0.42    | -0.28        |
| Scale ( $\beta_0$ )     | 0.75         | 0.95     | 1.15         |
| Scale ( $\beta_1$ )     | 0.001        | 0.002    | 0.003        |
| Shape ( $\varepsilon$ ) | -0.29        | -0.23    | -0.17        |
| <b>Northwest</b>        |              |          |              |
| Location( $\alpha_0$ )  | -0.87        | -0.67    | -0.46        |
| Scale ( $\beta_0$ )     | 1.53         | 1.68     | 1.82         |
| Shape ( $\varepsilon$ ) | -0.32        | -0.25    | -0.18        |
| <b>East</b>             |              |          |              |
| Location( $\alpha_0$ )  | -0.93        | -0.73    | -0.52        |
| Scale ( $\beta_0$ )     | 1.51         | 1.65     | 1.80         |
| Shape ( $\varepsilon$ ) | -0.38        | -0.31    | -0.24        |

40

41 **Table S.2: 95% Confidence intervals of parameters, using other climate variables based on the normal approximation**

|                         | 95% lower CI | Estimates | 95% Upper CI |
|-------------------------|--------------|-----------|--------------|
| <b>Southwest</b>        |              |           |              |
| Location ( $\alpha_0$ ) | 2.49         | 3.63      | 4.77         |
| Location ( $\beta_1$ )  | -0.18        | -0.14     | -0.11        |
| Scale ( $\beta_0$ )     | 0.96         | 1.12      | 1.28         |
| Shape( $\varepsilon$ )  | -0.33        | -0.21     | -0.10        |
| <b>Northwest</b>        |              |           |              |
| Location ( $\alpha_0$ ) | 4.84         | 6.25      | 7.67         |
| Location ( $\alpha_1$ ) | -0.17        | -0.15     | -0.12        |
| Scale ( $\beta_0$ )     | 1.60         | 2.38      | 3.17         |
| Scale ( $\beta_1$ )     | -0.48        | -0.31     | -0.14        |
| Shape ( $\varepsilon$ ) | -0.20        | -0.07     | 0.06         |
| <b>East</b>             |              |           |              |
| Location ( $\alpha_0$ ) | 3.01         | 5.09      | 7.17         |
| Location ( $\beta_1$ )  | -0.17        | -0.13     | -0.08        |
| Scale ( $\beta_0$ )     | 1.26         | 1.48      | 1.71         |
| Shape ( $\varepsilon$ ) | -0.39        | -0.24     | -0.10        |

42

43 **Table S.3: 95% Confidence intervals of parameters, using other climate variables based on the normal approximation**

|                         | 95% lower CI | Estimate | 95% upper CI |
|-------------------------|--------------|----------|--------------|
| <b>Southwest</b>        |              |          |              |
| Scale ( $\beta_0$ )     | 0.33         | 0.78     | 1.24         |
| Shape ( $\varepsilon$ ) | -0.64        | -0.20    | 0.22         |
| <b>Northwest</b>        |              |          |              |
| Scale ( $\beta_0$ )     | 0.78         | 2.02     | 3.25         |

|                        |       |       |       |
|------------------------|-------|-------|-------|
| Shape( $\varepsilon$ ) | -1.01 | -0.53 | -0.05 |
| East                   |       |       |       |
| Scale( $\beta_0$ )     | 0.85  | 1.88  | 2.91  |
| Shape( $\varepsilon$ ) | -1.13 | -0.65 | -0.18 |

44

45 **Table S.4: Pearson and Spearman correlation coefficients in winter minimum temperature between Mongolia data and**  
 46 **Siberia data**

|                                   | Southwest | Northwest | East  |
|-----------------------------------|-----------|-----------|-------|
| Pearson correlation coefficients  |           |           |       |
| Irkutsk, Siberia                  | 0.57      | 0.72      | 0.76  |
| Ulan-Ude, Siberia                 | -0.14     | -0.13     | -0.21 |
| Minusinsk, Siberia                | -0.04     | -0.09     | -0.16 |
| Spearman correlation coefficients |           |           |       |
| Irkutsk, Siberia                  | 0.52      | 0.61      | 0.60  |
| Ulan-Ude, Siberia                 | -0.14     | -0.19     | -0.22 |
| Minusinsk, Siberia                | -0.02     | -0.08     | -0.08 |

47

48 **Table S.5: Estimated parameters based on the best GEV model fitted to the winter minimum temperature in Southwest**  
 49 **using Irkutsk data.**

|                         | Estimate | Standard Error Estimates |
|-------------------------|----------|--------------------------|
| Southwest               |          |                          |
| Location ( $\alpha_0$ ) | 11.82    | 1.22                     |
| Location ( $\alpha_1$ ) | 0.39     | 0.06                     |
| Scale ( $\beta_0$ )     | 1.90     | 0.14                     |
| Shape ( $\varepsilon$ ) | -0.25    | 0.06                     |
| Northwest               |          |                          |
| Location ( $\alpha_0$ ) | 12.67    | 1.00                     |
| Location ( $\alpha_1$ ) | 0.52     | 0.05                     |
| Scale ( $\beta_0$ )     | 0.35     | 0.66                     |
| Scale ( $\beta_1$ )     | 0.06     | 0.03                     |
| Shape                   | -0.18    | 0.06                     |
| East                    |          |                          |
| Location ( $\alpha_0$ ) | 10.20    | 0.80                     |
| Location ( $\alpha_1$ ) | 0.48     | 0.04                     |
| Scale ( $\beta_0$ )     | 1.40     | 0.10                     |
| Shape ( $\varepsilon$ ) | -0.38    | 0.05                     |

50

51 **Table S.6: Estimated parameters based on the best GPD model fitted to the winter minimum temperature in Southwest using**  
 52 **Irkutsk data.**

|                      | Estimate | Standard Error Estimates |
|----------------------|----------|--------------------------|
| Southwest            |          |                          |
| Scale ( $\alpha_0$ ) | -4.18    | 1.60                     |

|                      |       |       |
|----------------------|-------|-------|
| Scale ( $\alpha_1$ ) | 0.34  | 0.09  |
| Shape                | -0.54 | 0.13  |
| Northwest            |       |       |
| Scale( $\beta_3$ )   | 2.30  | 2e-08 |
| Scale ( $\beta_4$ )  | 0.35  | 2e-08 |
| Shape                | -1.15 | 2e-08 |
| East                 |       |       |
| Scale                | -1.63 | 2e-08 |
| Scale ( $\beta_4$ )  | 0.26  | 2e-08 |
| Shape                | -1.06 | 2e-08 |

53

54
